# Supplementary material for: Characterization of P-Glycoprotein Inhibitors for Evaluating the Effect of P-Glycoprotein on the Intestinal Absorption of Drugs
Source: PubMed Central journal article supplement (PMC7999658; doi:10.3390/pharmaceutics13030388), 2021-03-15
Supplement: pharmaceutics-13-00388-s001.pdf [file pharmaceutics-13-00388-s001.pdf]

## Supplementary Materials: Characterization of P-glycoprotein Inhibitors for Evaluating the Effect of P-glycoprotein on the Intestinal Absorption of Drugs

Yusuke Kono <sup>1</sup>, Ichiro Kawahara <sup>2,†</sup>, Kohei Shinozaki <sup>2</sup>, Ikuo Nomura <sup>2</sup>, Honoka Marutani <sup>1</sup>, Akira Yamamoto <sup>2</sup> and Takuya Fujita <sup>1,\*</sup>

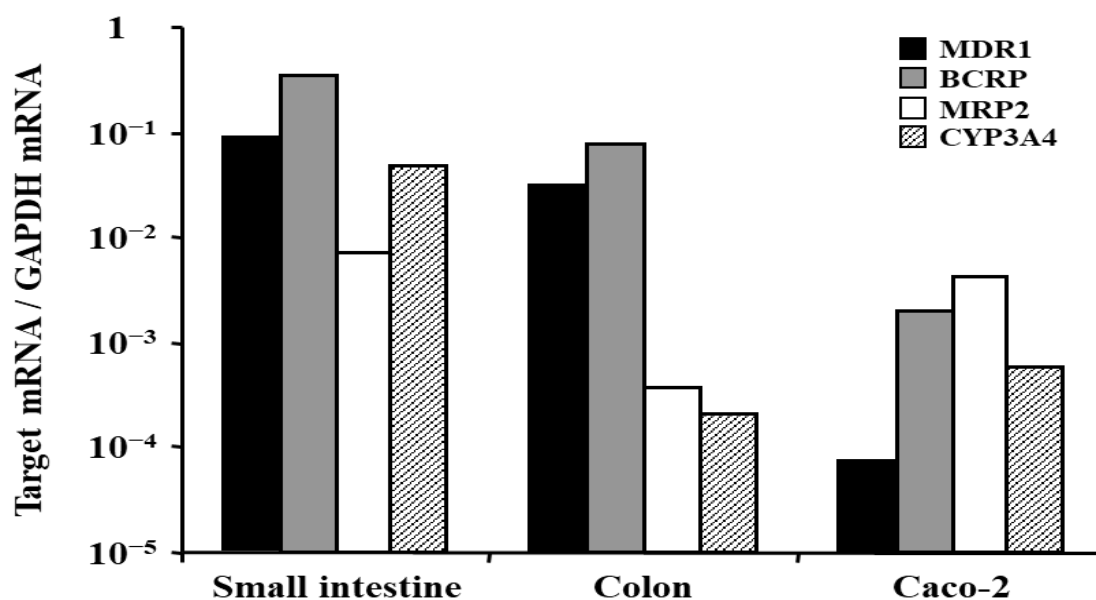

**Figure S1.** Relative mRNA expression levels of MDR1, BCRP, MRP2, and CYP3A4 in human small intestine, colon and Caco-2 cells. Relative mRNA expression levels were determined by real-time RT-PCR. GAPDH was selected as an endogenous RNA control to normalize for difference in amount of total RNA.

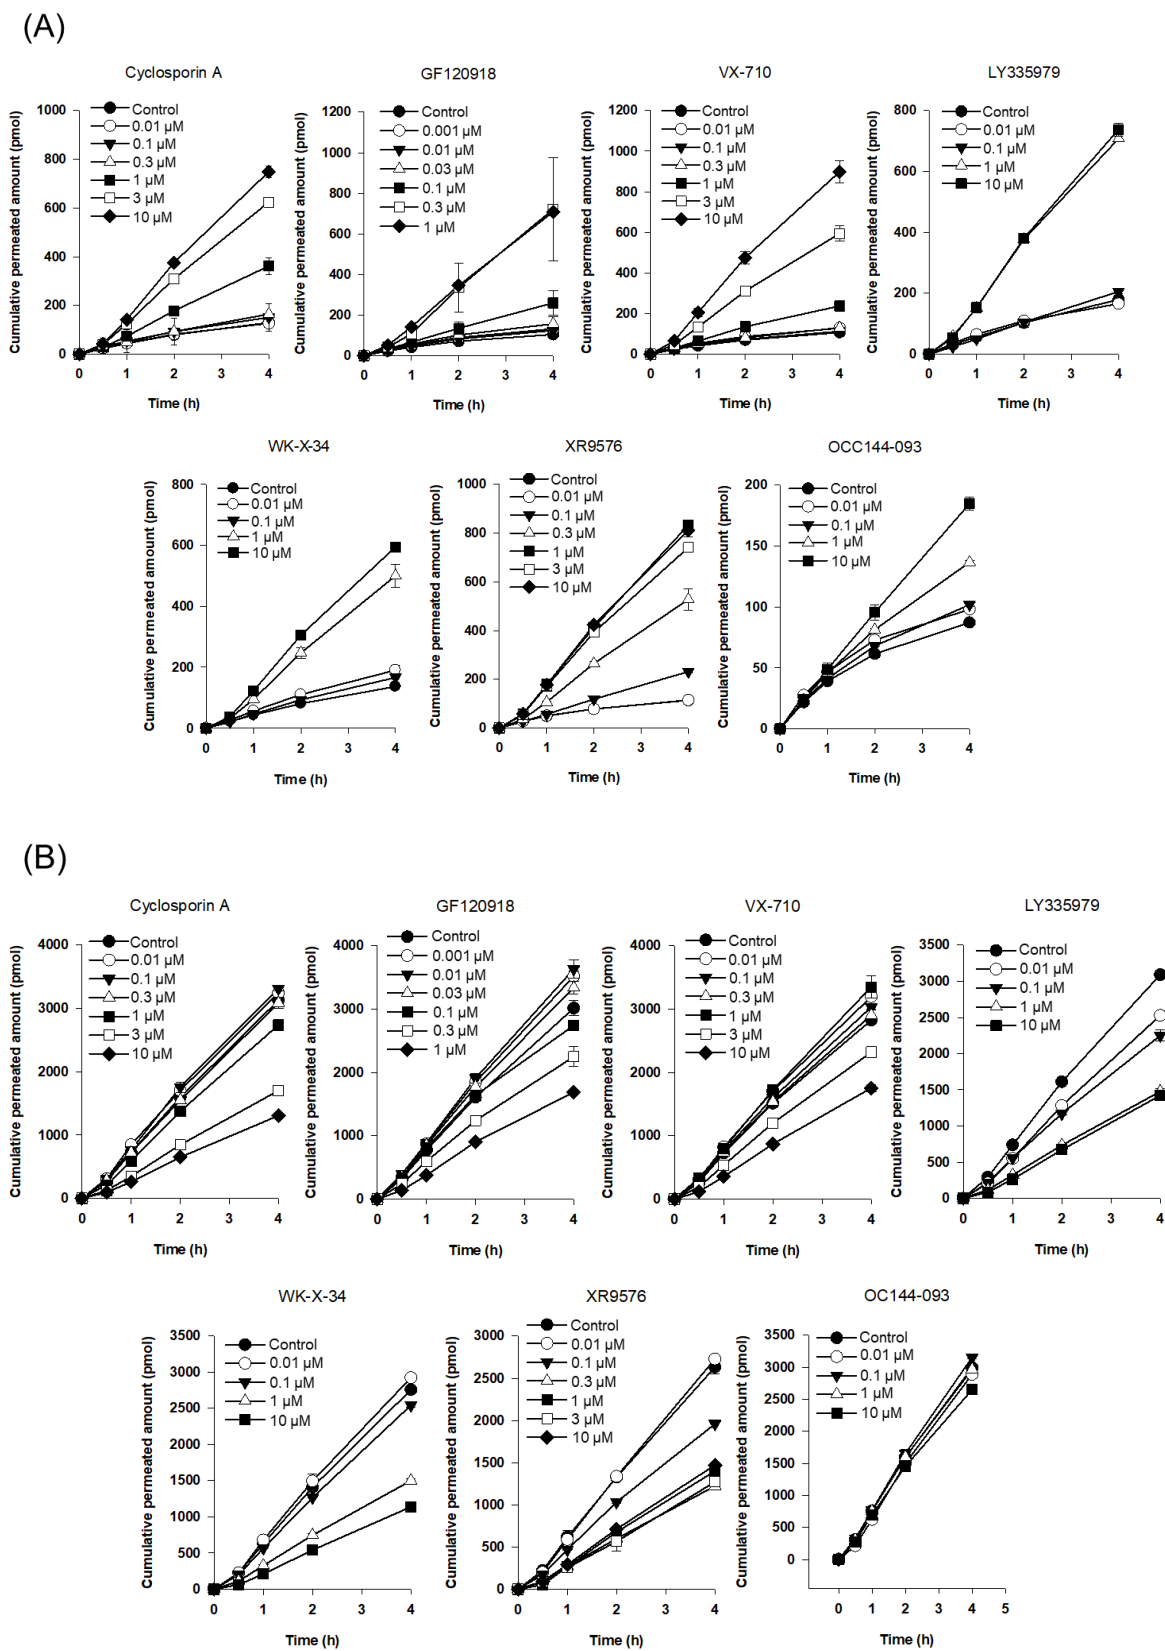

**Figure S2.** Bidirectional transport of paclitaxel across Caco-2 cell monolayers. The apical-to-basal (A) and basal-to-apical (B) transport of paclitaxel (5  $\mu$ M) in the presence or absence of various concentrations of P-gp inhibitors. Data are represented as mean  $\pm$  S.D. for 3 experiments using different well in a single passage of Caco-2 cells.

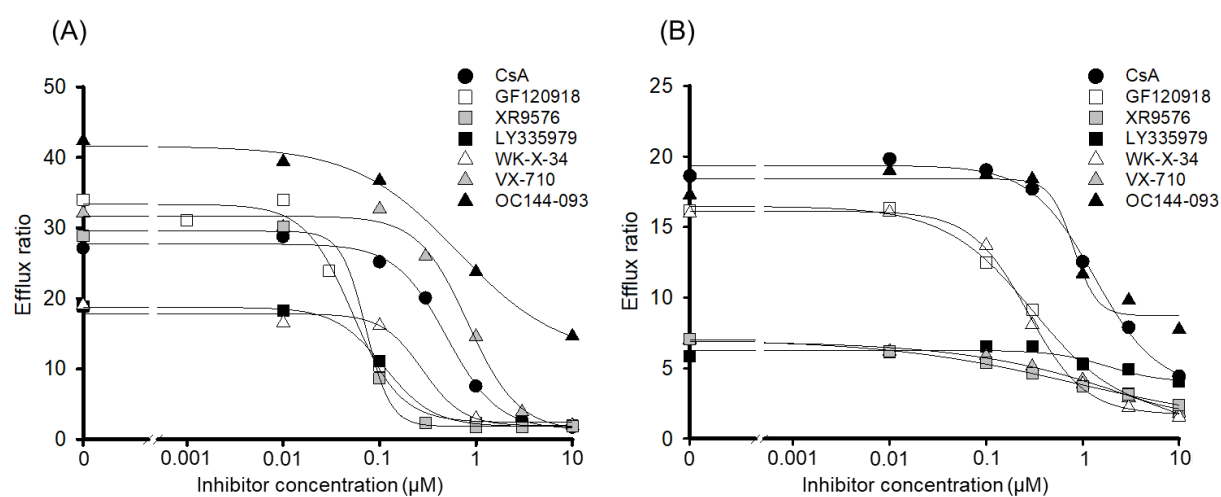

**Figure S3.** Efflux ratio (*ER*) of paclitaxel and mitoxantrone in Caco-2 cells with P-gp inhibitors. The *ER* values were calculated using the mean values of  $P_{app,AB}$  and  $P_{app,BA}$  of paclitaxel and mitoxantrone in Caco-2 cells in the presence or absence of various concentrations of P-gp inhibitors.

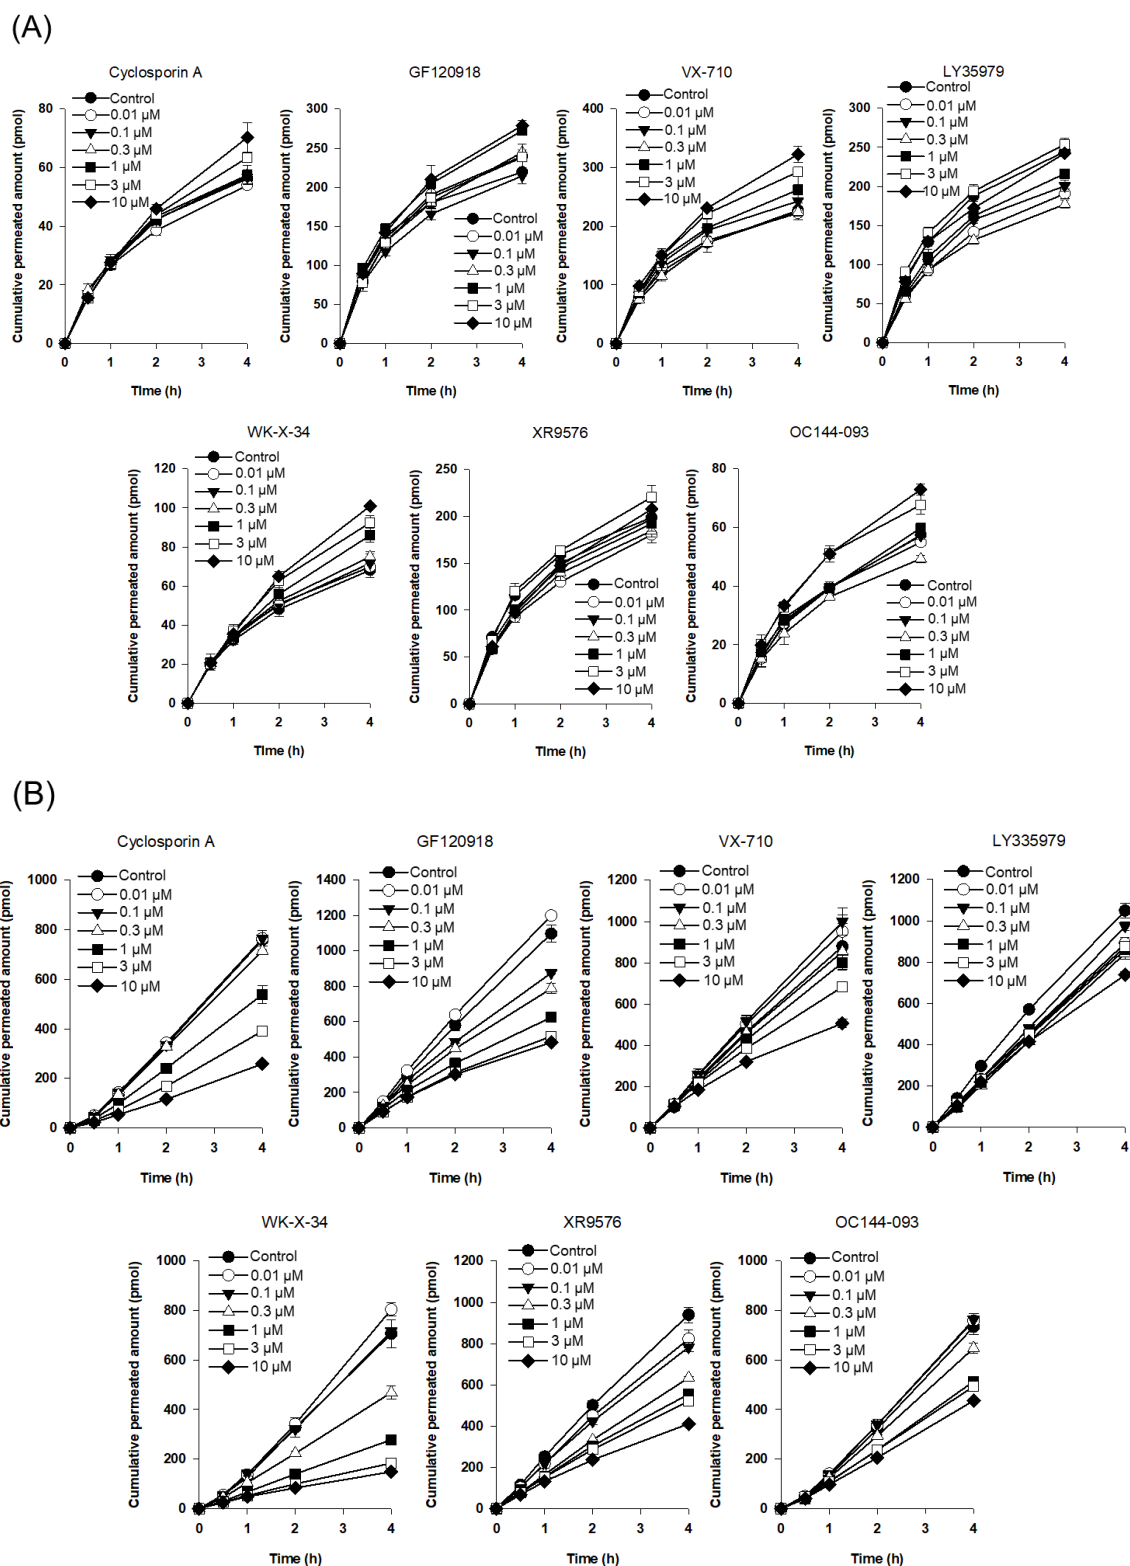

**Figure S4.** Bidirectional transport of mitoxantrone across Caco-2 cell monolayers. The apical-to-basal (A) and basal-to-apical (B) transport of mitoxantrone (5 μM) in the presence or absence of various concentrations of P-gp inhibitors. Data are represented as mean ± S.D. for 3 experiments using different well in a single passage of Caco-2 cells.
